# Supplementary material for: A Systems Biology Approach to Investigating Sex Differences in Cardiac Hypertrophy
Source: PubMed Central journal article supplement — J Am Heart Assoc. 2017 Aug 19;6(8):e005838. doi: 10.1161/JAHA.117.005838 (PMC5586433; doi:10.1161/jaha.117.005838), 2017-08-19

# **SUPPLEMENTAL MATERIAL**

**Tables S1-S4 Legends (please see supplemental Excel files):**

**Table S1.** Selected mRNAs transcripts. mRNA transcripts with greater than 2 fold changes and 10% FDR.

**Table S2.** Co-expression network of the 4,422 genes showing significant variations in response to either sex, or hypertrophy, or the interaction of sex and hypertrophy. Their membership modules are given in the GO and Panther tabs.

**Table S3.** Genes that showed significant changes in hypertrophy when sex as a co-factor is controlled, significant sex-dependent variation when hypertrophy as a co-factor is controlled, and significant sex-dependent differential hypertrophy-associated changes. Pathway enrichment analysis results are in tab 2.

**Table S4.** Data set of microRNAs.

**Table S5. Overrepresentation of transcription factor (TF) families in identified genes by interaction model**

| TF Families | Over representation | Z-Score | Gene list for TF family                                                                         | Full name                                  |
|-------------|---------------------|---------|-------------------------------------------------------------------------------------------------|--------------------------------------------|
| V\$ZF02     | 1.7                 | 28.52   | Zbtb7a Zbtb7b Zfp148<br>Zfp202 Zfp219<br>Zfp281,Zkscan3                                         | zinc finger and BTB domain containing      |
| V\$EGRF     | 1.67                | 28.03   | Egr1 Egr2 Egr3 Egr4,<br>Wt1                                                                     | early growth response                      |
| V\$ZF5F     | 1.96                | 26.13   | Zbtb14                                                                                          | zinc finger and BTB domain containing 14   |
| V\$E2FF     | 1.6                 | 25.97   | E2f1 E2f2 E2f3 E2f4 E2f5<br>E2f6 E2f7 E2f8                                                      | E2F transcriptional factor                 |
| V\$SP1F     | 1.65                | 24.15   | Sp1 Sp2 Sp3 Sp4 Sp5<br>Sp6 Sp7 Sp8                                                              | trans-acting transcription factor          |
| V\$KLFS     | 1.45                | 23.15   | Klf1 Klf12 Klf13 Klf15<br>Klf17 Klf2 Klf3 Klf4 Klf6<br>Klf7 Klf8 Klf9 Klf10 Klf11<br>Klf16 Klf5 | Kruppel-like factor 1 (erythroid)          |
| V\$BEDF     | 1.86                | 22.62   | Zbed4                                                                                           | zinc finger, BED type containing 4provided |
| V\$CTCF     | 1.68                | 20.33   | Ctcf Ctcf1                                                                                      |                                            |
| V\$PLAG     | 1.63                | 19.93   | Plag1 Plagl1 Plagl2                                                                             |                                            |
| V\$MAZF     | 1.71                | 19.71   | Maz Patz1                                                                                       |                                            |
| V\$GCF2     | 2.08                | 19.69   | Lrrfip1                                                                                         |                                            |
| V\$NDPK     | 1.74                | 18.69   | Nme1 Nme2                                                                                       |                                            |

**Figure S1. qPCR measurement**

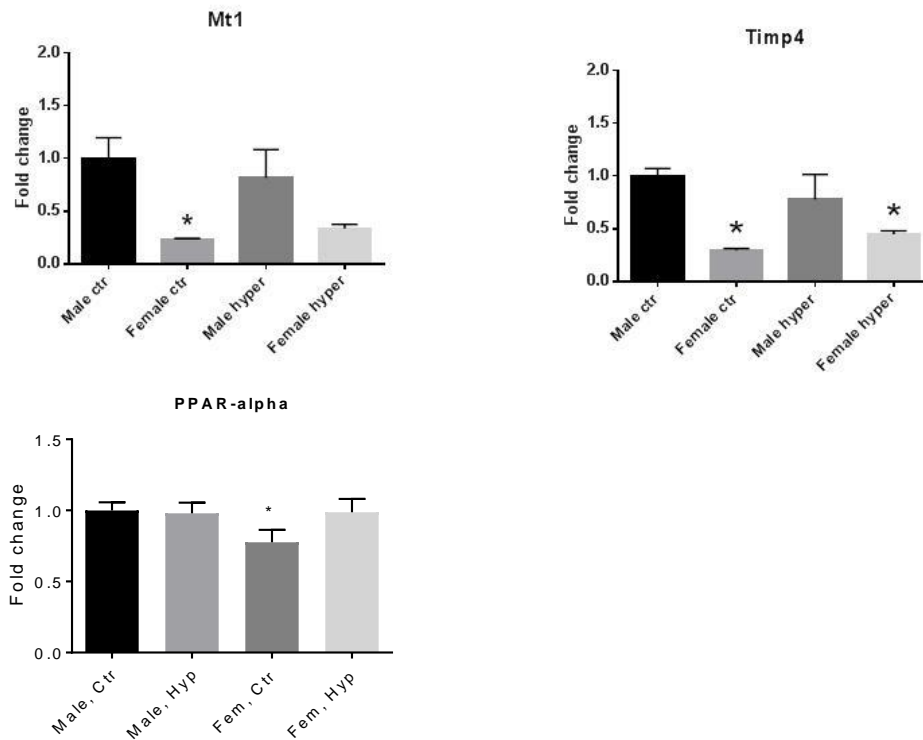

Confirmation of transcripts showing a sex difference. Quantitative polymerase chain reaction (PCR) analysis confirming the RNA-seq data for metallothionein (Mt) and Metalloproteinase inhibitor 4 (TIMP4). mRNA transcripts were quantified using SYBR green (n=3-7 per group). 18s RNA was used for normalizations. Data are mean +/- standard error measurement (SEM) normalized to the male control. \*p<0.05 vs. male control.

**Figure S2.** Sex differences in expression changes of genes identified by network analysis in figure 7.

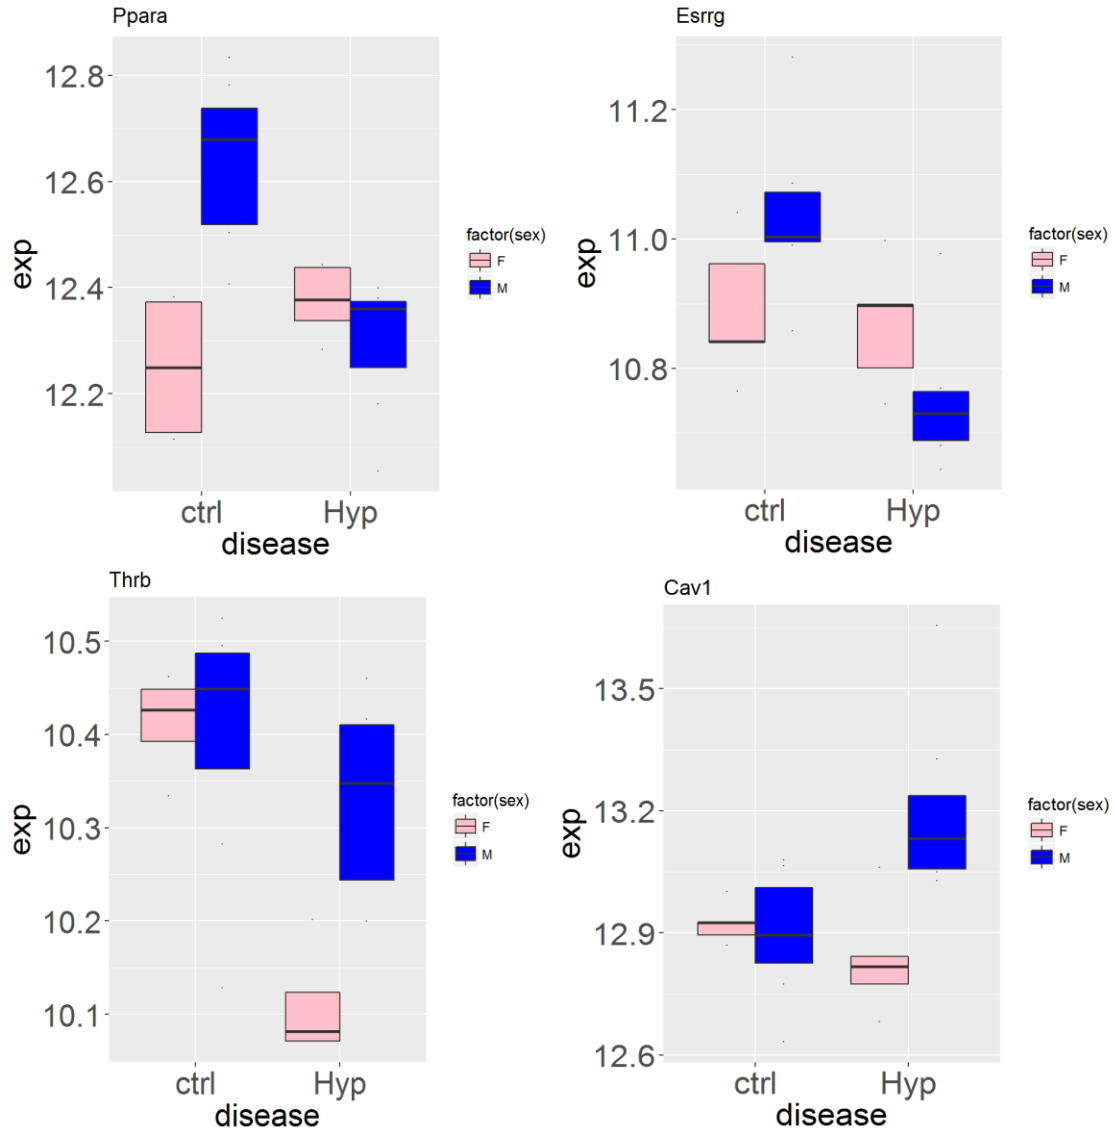

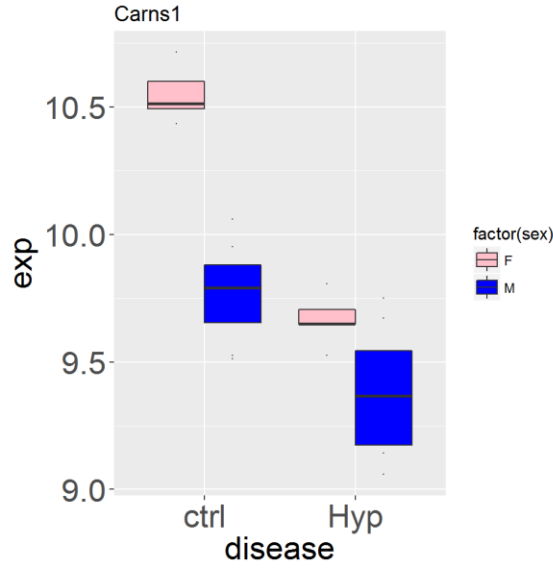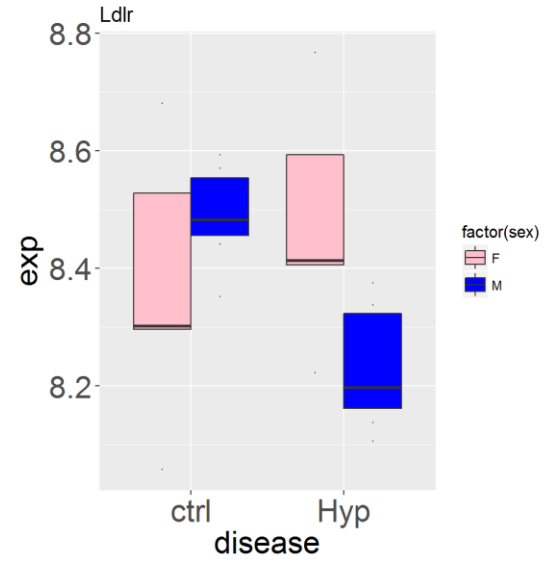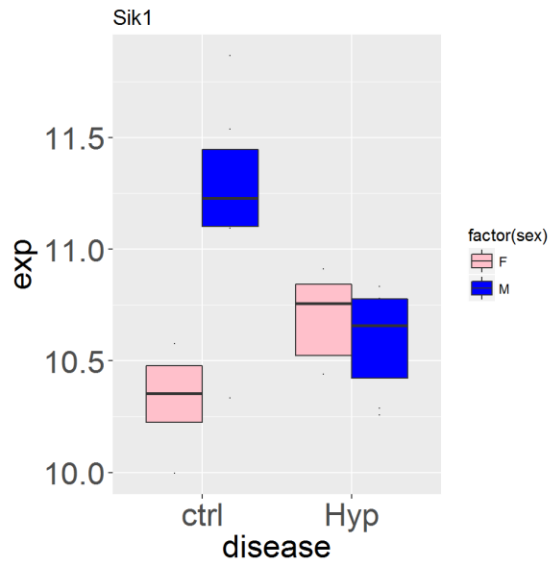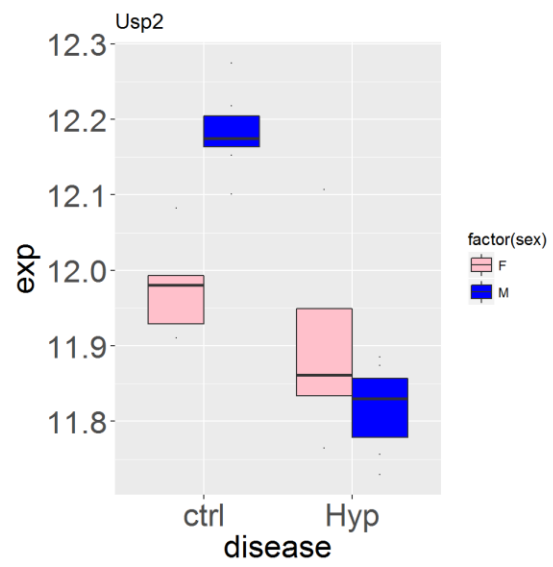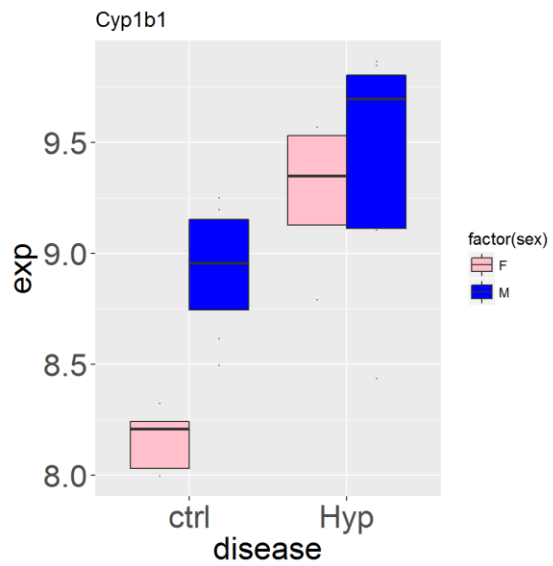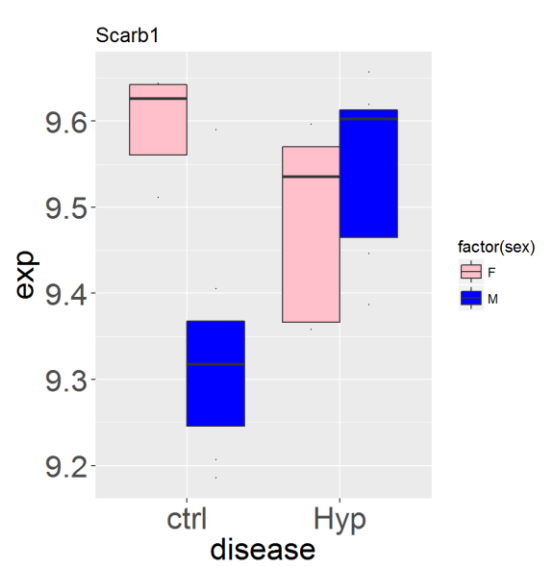

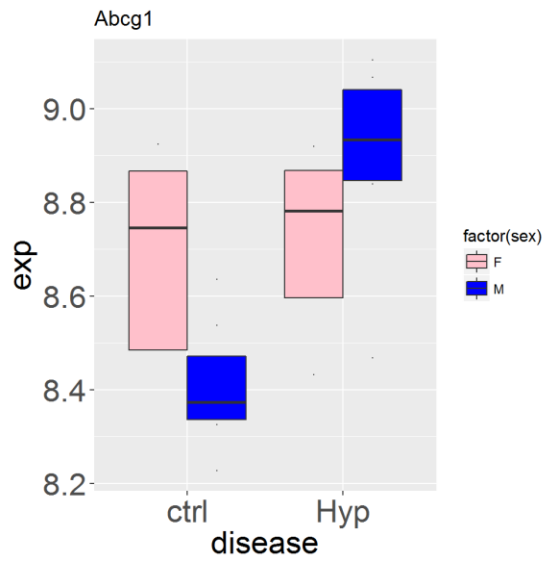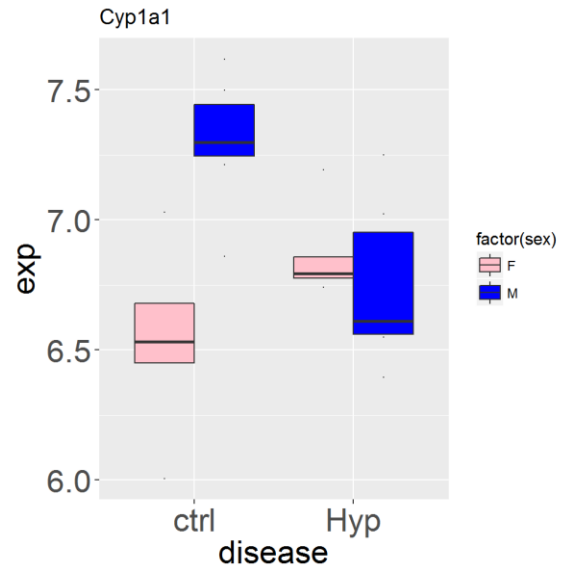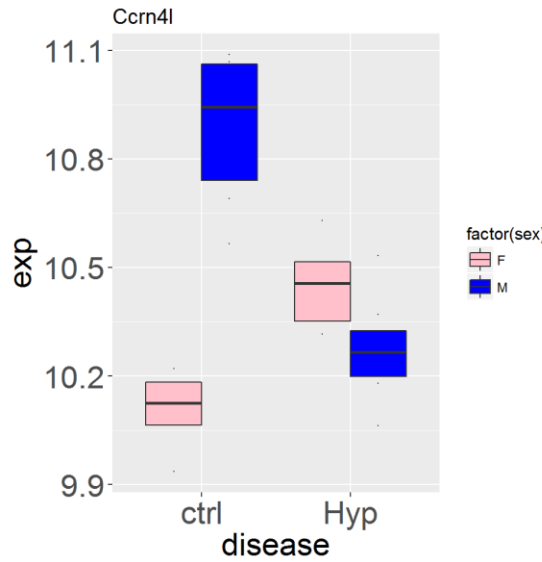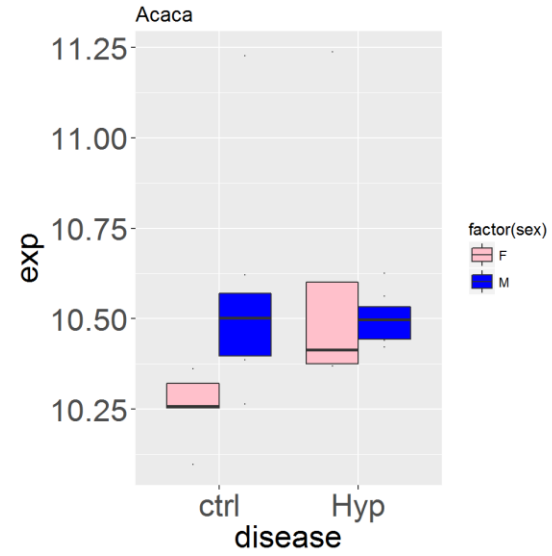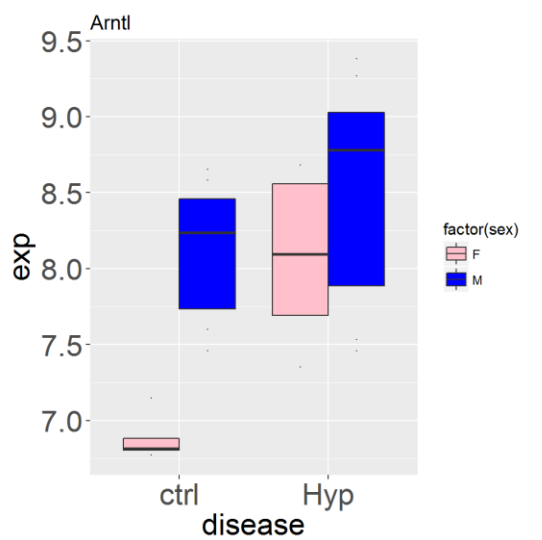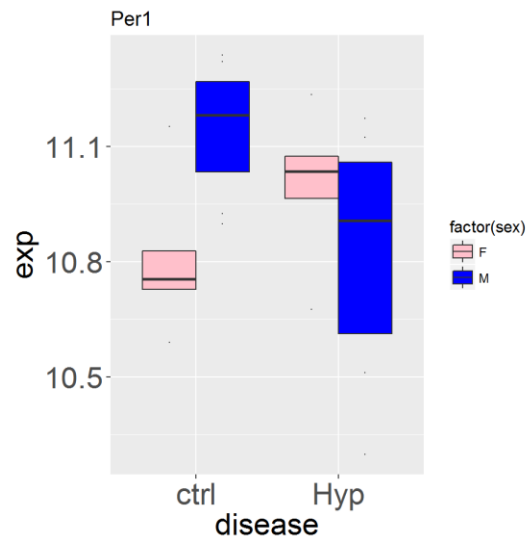

Figure S3. Volcano plots of miRNA with sex and hypertrophy

A

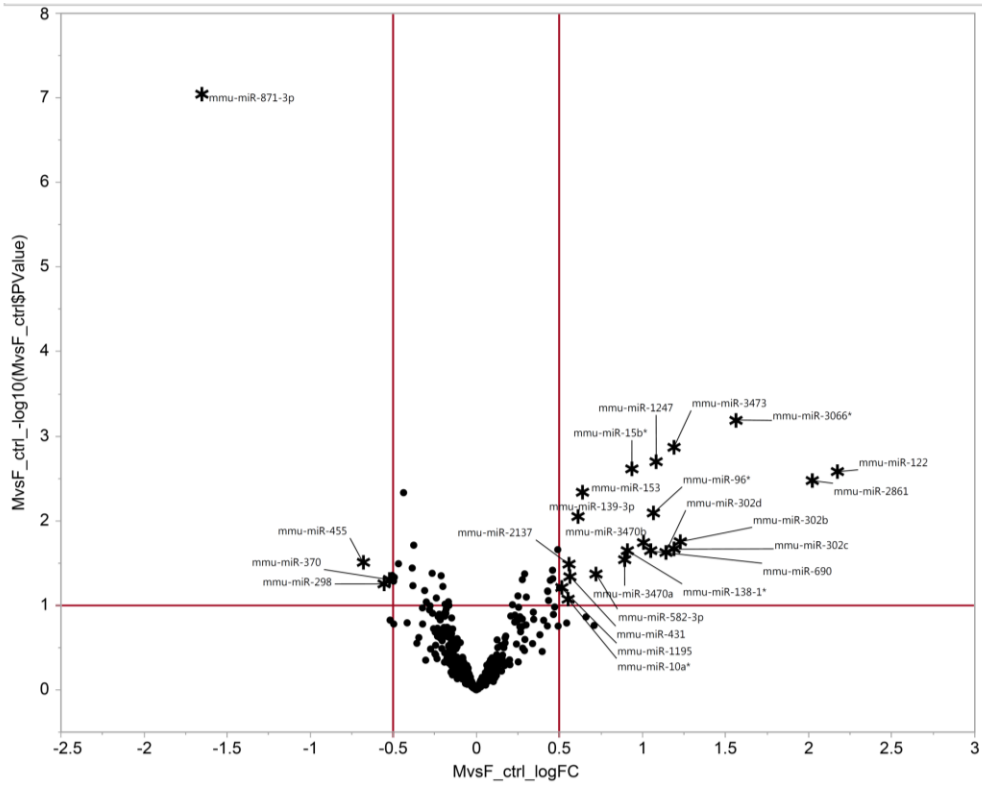

B

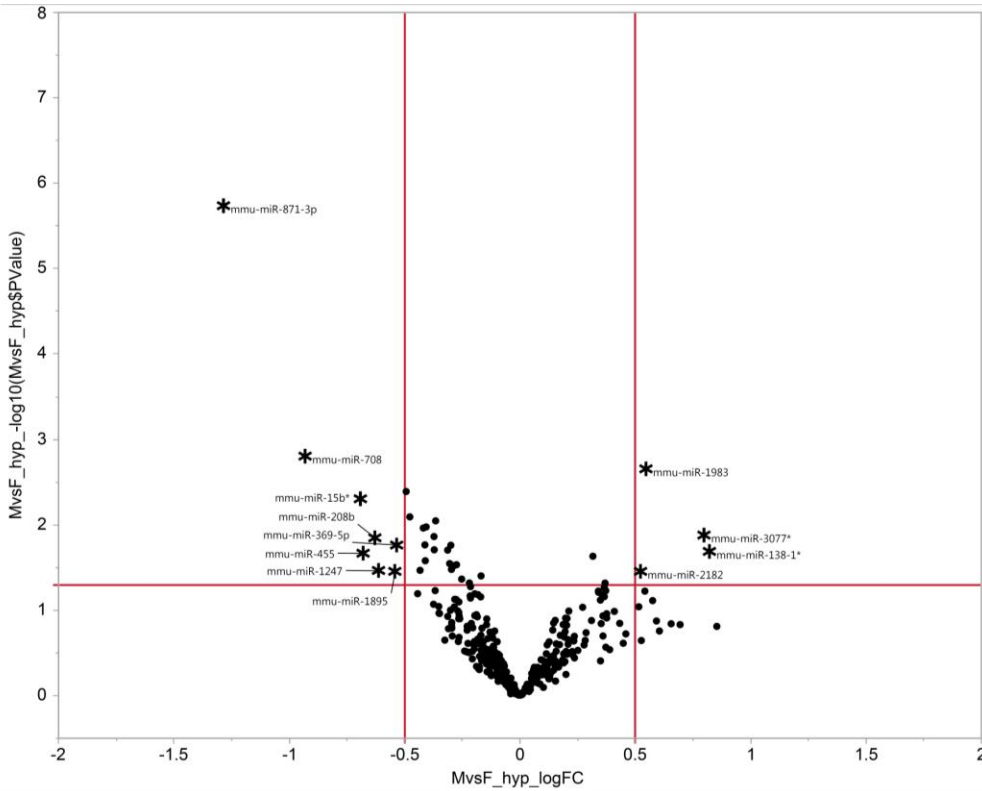



**C**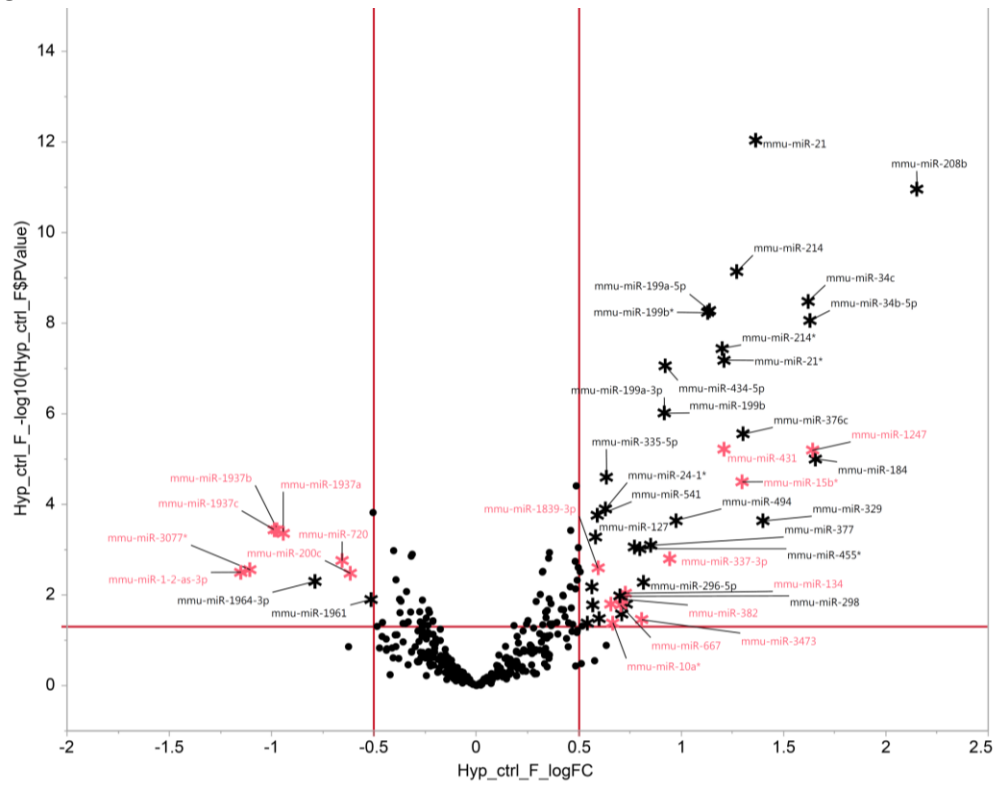**D**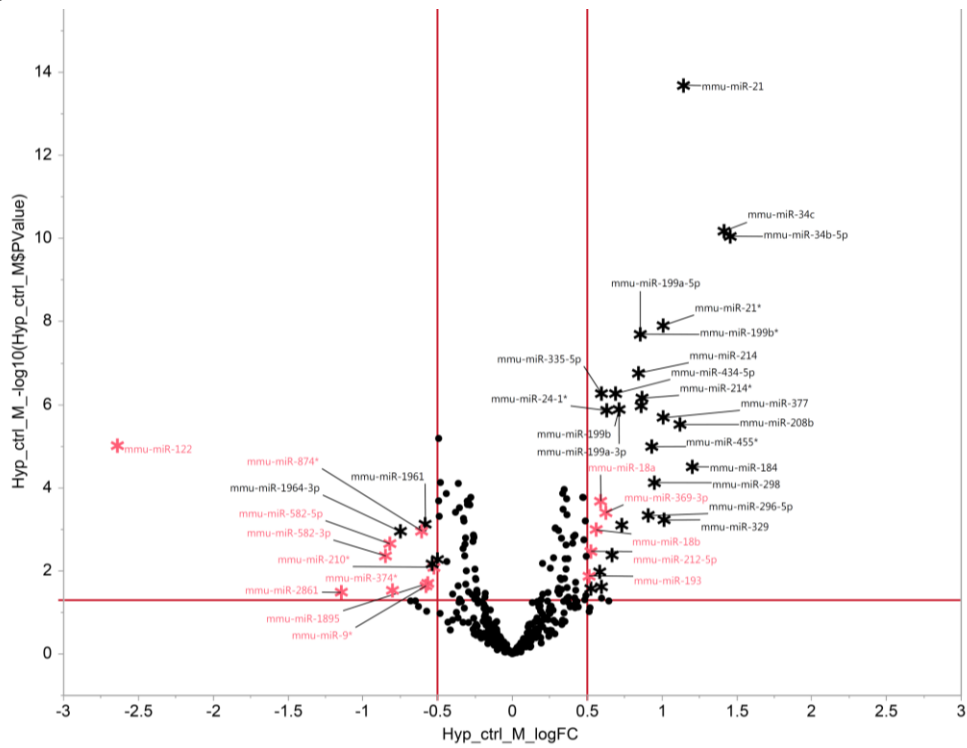

Supplement: JAH3-6-e005838-s005.pdf [file JAH3-6-e005838-s005.pdf]
